# Supplementary material
Source: PubMed Central journal article supplement (PMC7904662)
Supplement: NIHMS1660531-supplement-1.pdf [file NIHMS1660531-supplement-1.pdf]

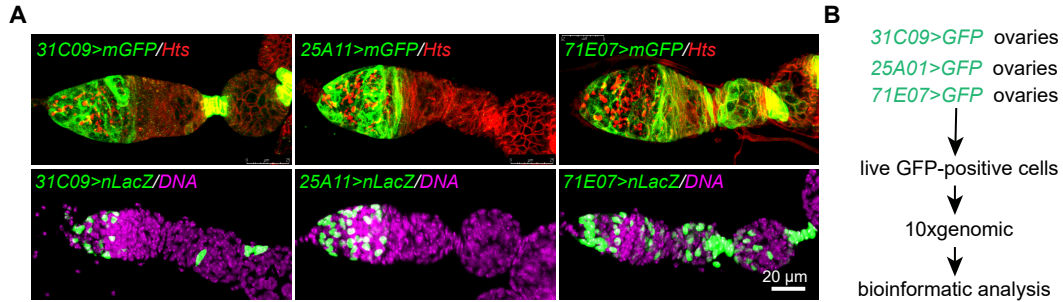

**Figure S1. *71E07* and *31C09* are expressed in other somatic cells in addition to IGS cells.**

**Related to Figure 1.** (A) *31C09-Gal4*-, *25A11-Gal4*- and *71E07-Gal4*-driven *UAS-mGFP* or *UAS-nLacZ* expression patterns in the germarium and early egg chambers. In addition to IGS cells, *31C09-Gal4* is also expression in stalk cells, while *71E07-Gal4* is also expressed in stalk cells and follicle cells. Scale bars, 10  $\mu\text{m}$ . (B) Experimental procedures for IGS scRNA-seq.

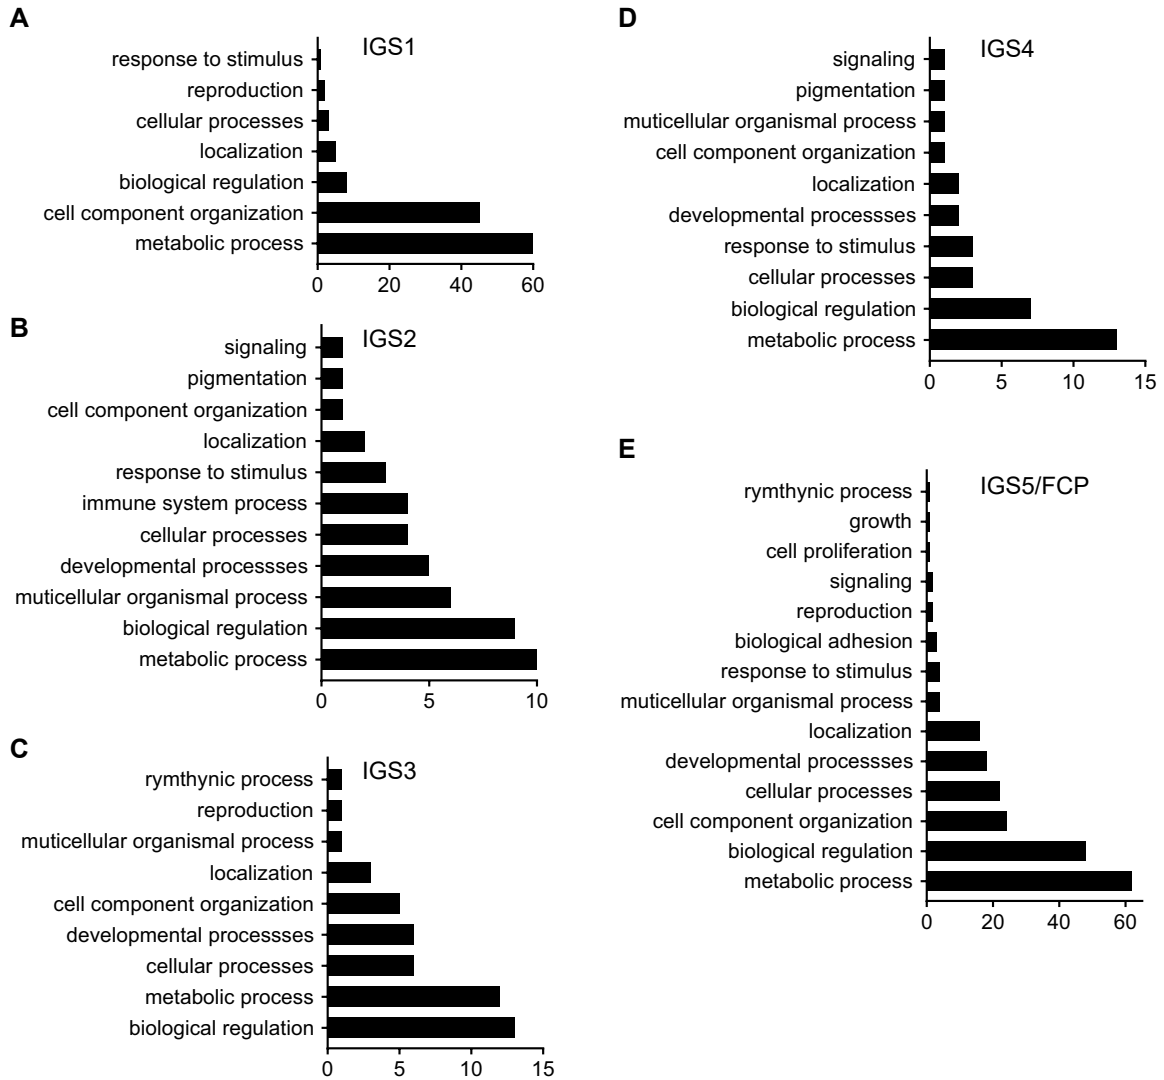

**Figure S2. GO term analyses of the five IGS subpopulation-enriched genes. Related to Figure 1.** (A-E) Graphs showing the overrepresented GO terms for the genes enriched in IGS1-4 and IGS5 (FCP) subpopulations.

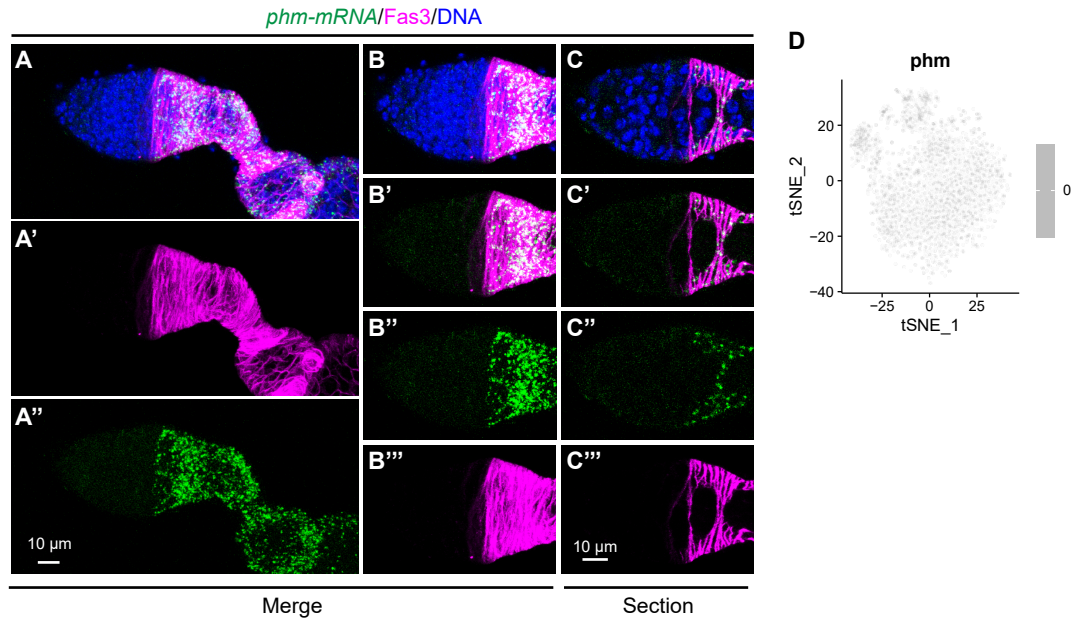

**Figure S3. *phm* is expressed in Fas3-expressing differentiated follicle cells. Related to Figure 2.** (A-C'') Immunostaining and FISH confocal images showing the expression patterns of *phm* and Fas3 in the *Drosophila* germarium. B-B'' are enlarged images, C-C'' are single section confocal images. Scale bars, 10  $\mu$ m. (D) t-SNE plot of *phm* showing a lack of its expression in IGS cells.

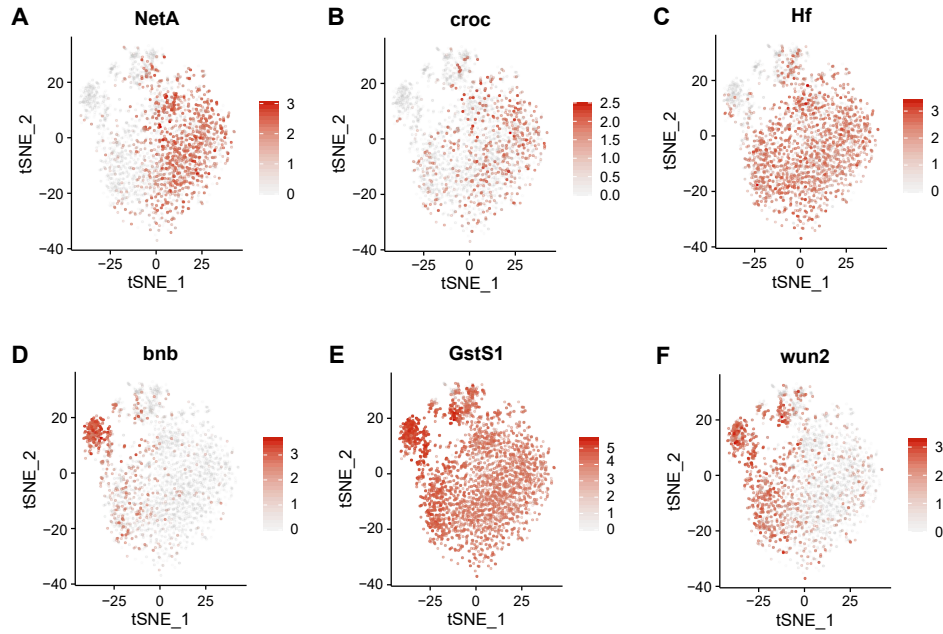

**Figure S4. IGS subpopulations-specific genes. Related to Figure 2.** (A-F) t-SNE plots of *NetA*, *croc*, *Hf*, *bnb*, *GstS1* and *wun2* in IGS populations.

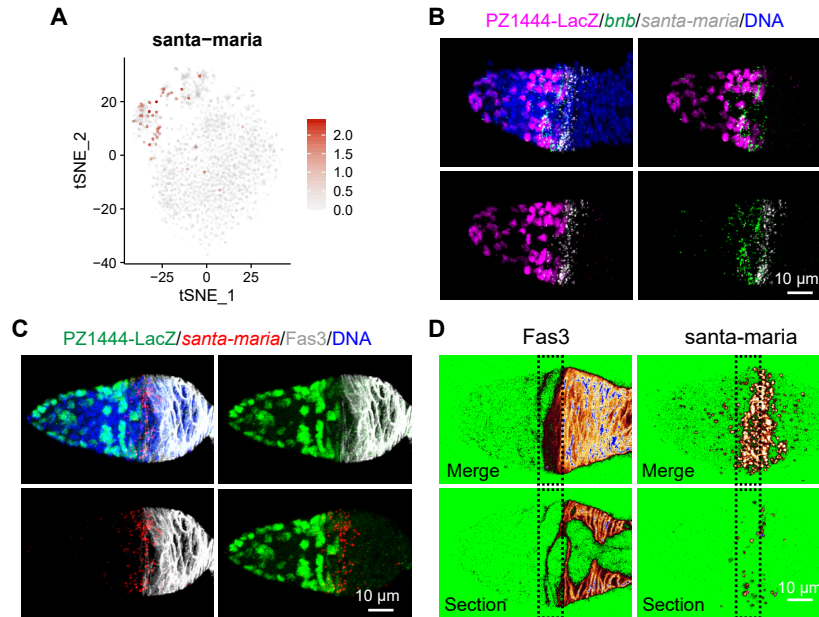

**Figure S5. *santa-maria* is mainly expressed in the FCP. Related to Figure 2.** (A) t-SNE plot showing *santa-maria* is mainly expressed in the FCP cluster (previously identified as IGS5). (B) Immunostaining and FISH confocal images showing that the *bnb*-expressing region is overlapped with the most posterior PZ1444-positive IGS cells, while the *santa-maria*-expressing region is located posterior to PZ1444-positive IGS cells. Scale bars, 10  $\mu\text{m}$ . (C) Immunostaining and FISH confocal images showing that *santa-maria* is mainly expressed between PZ1444-positive IGS cells and *Fas3*-positive follicle cells. Scale bars, 10  $\mu\text{m}$ . (D) Section and merged confocal images showing *santa-maria* expression mainly in low *Fas3*-expressing FCP cells. Scale bars, 10  $\mu\text{m}$ .

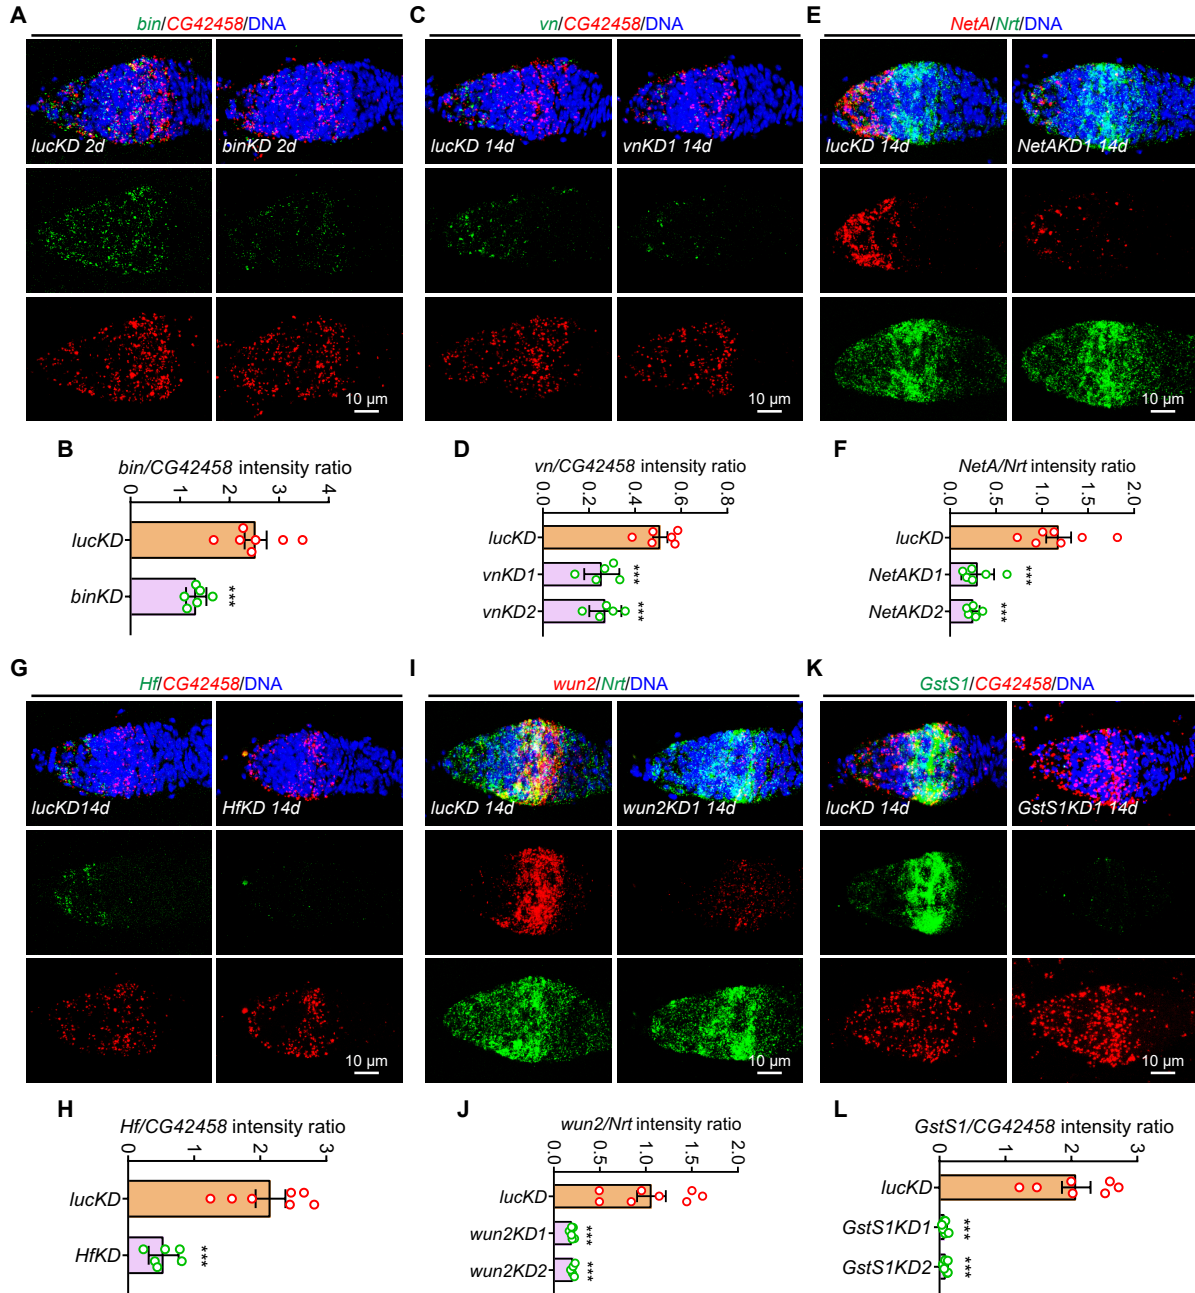

**Figure S6.** *c587<sup>ts</sup>*-driven shRNA expression can efficiently knock down *bin*, *vn*, *NetA*, *Hf*, *wun2* and *GstS1* in adult IGS cells. Related to Figures 5, 6 and 7. (A-L) mRNA FISH results show that *c587<sup>ts</sup>*-driven shRNA expression can significantly decrease the mRNA expression of *bin* (A, B), *vn* (C, D), *NetA* (E, F), *Hf* (G, H), *wun2* (I, J) and *GstS1* (K, L) in adult IGS cells. Internal controls: *CG42458* for A, C, G, K; *Nrt* for E and I. mRNA FISH quantification results: B, D, F, H, J and L. Scale bars, 10  $\mu$ m. Student's t-test: \*\*\*,  $P \leq 0.001$ .

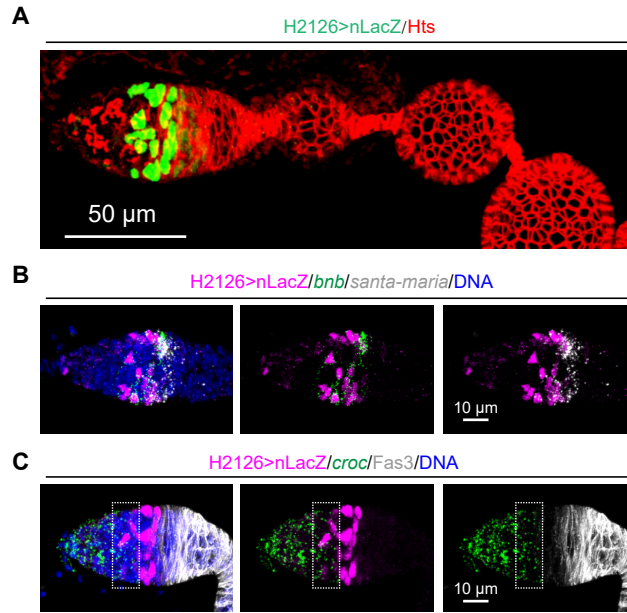

**Figure S7. *H2126-SwitchGal4* is mainly expressed in IGS4 and also in some IGS3 cells.**

**Related to Figure 7.** (A) Confocal images showing the *H2126*-driven *UAS-nLacZ* expression pattern in the gerarium. Scale bars, 50 µm. (B) Immunostaining and FISH confocal images showing that the *H2126*-expressing region physically contacts the *santa-maria*-expression region and much broader than the *bnb*-expressing region. Scale bars, 10 µm. (C) Immunostaining and FISH confocal images showing that the *H2126*-expressing region is overlapped with the *croc*-expression region. Scale bars, 10 µm.
